# Supplementary material for: The effect of strain and functionalization on the optical properties of borophene
Source: Royal Society of Chemistry journal article supplement (doi:10.1039/c8cp03594f), 2018-01-01
Supplement: c8cp03594f1.pdf [file c8cp03594f1.pdf]

Electronic Supplementary Information (ESI)

The effect of strain and functionalization on the optical properties of borophene

A. Mogulkoc\*

*Department of Physics, Faculty of Sciences, Ankara University, 06100, Tandogan, Ankara, Turkey*

Y. Mogulkoc

*Department of Physics Engineering, Faculty of Engineering,  
Ankara University, 06100, Tandogan, Ankara, Turkey*

D. Kecik

*UNAM - National Nanotechnology Research Center and Institute of Materials  
Science and Nanotechnology, Bilkent University, Ankara, 06800, Turkey and  
Department of Physics, Bilkent University, Ankara, 06800, Turkey*

E. Durgun

*UNAM - National Nanotechnology Research Center and Institute of Materials  
Science and Nanotechnology, Bilkent University, Ankara, 06800, Turkey*

(Dated: July 24, 2018)

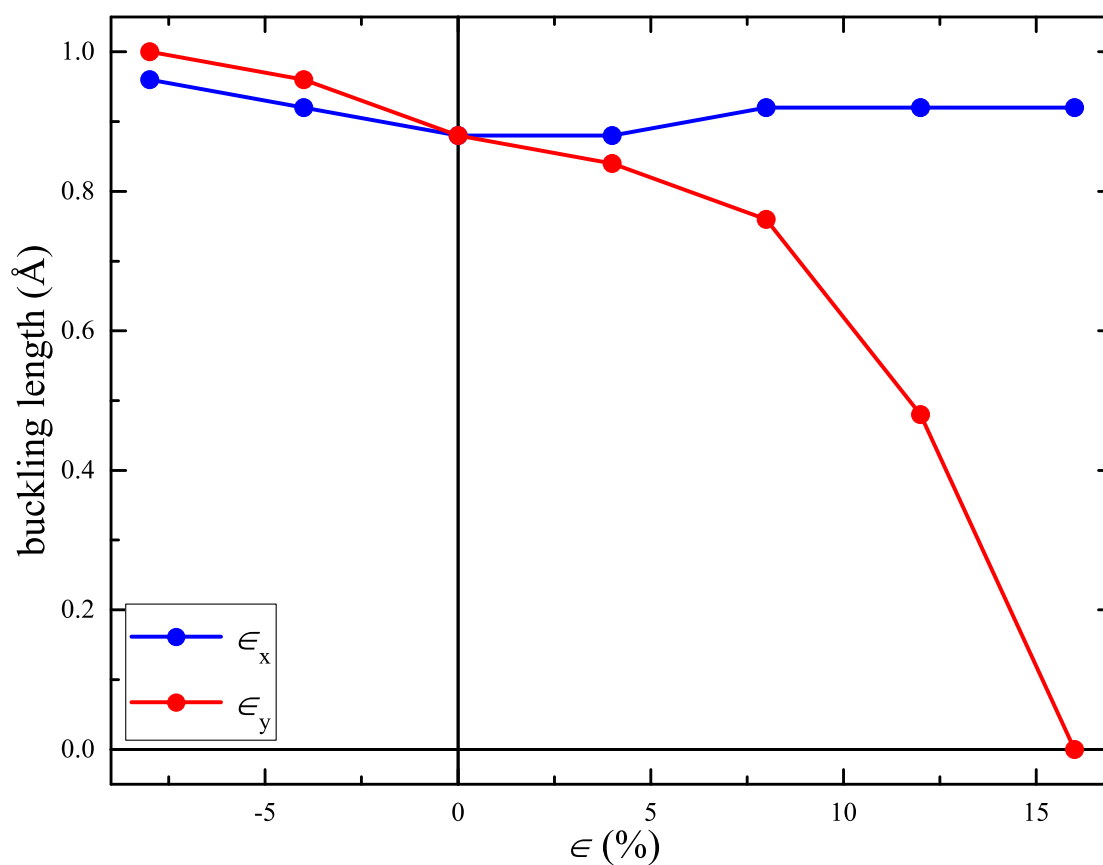

FIG. S1: Variation of buckling length with uniaxial strain.

\*Electronic address: mogulkoc@science.ankara.edu.tr

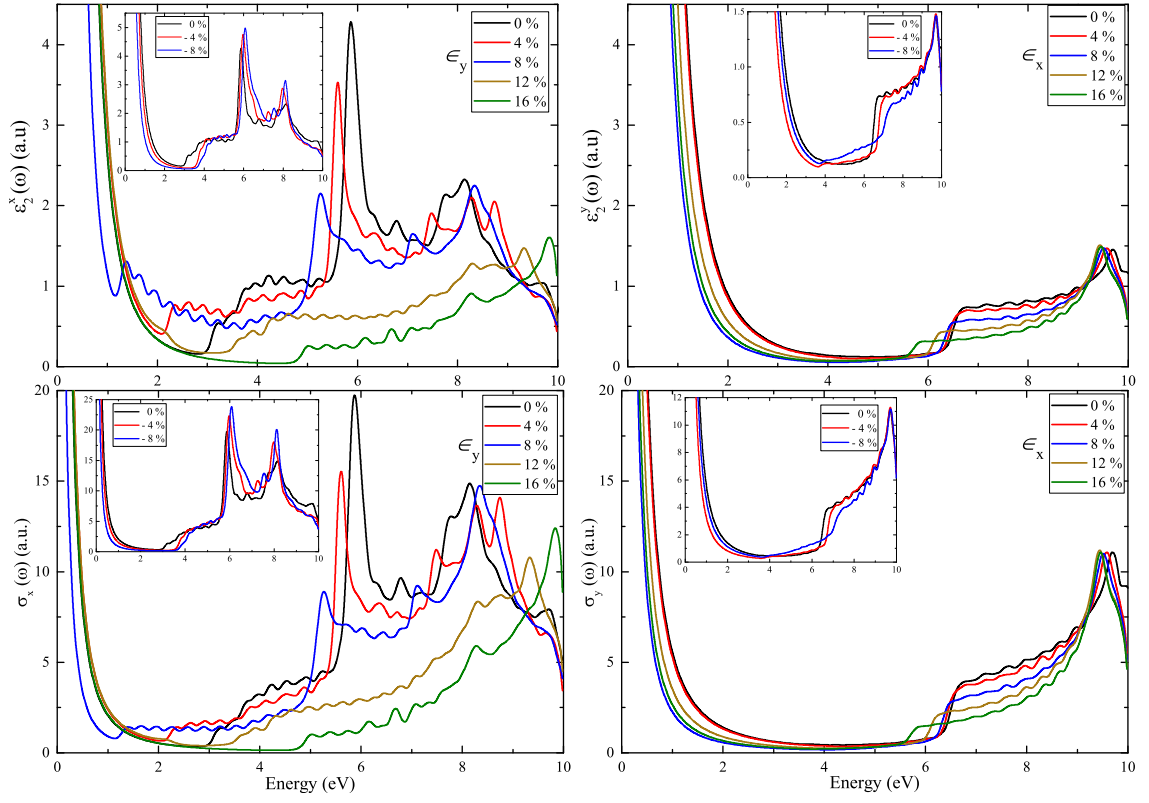

FIG. S2: Frequency dependent imaginary dielectric function and optical conductivity for pristine and strained buckled-borophene.

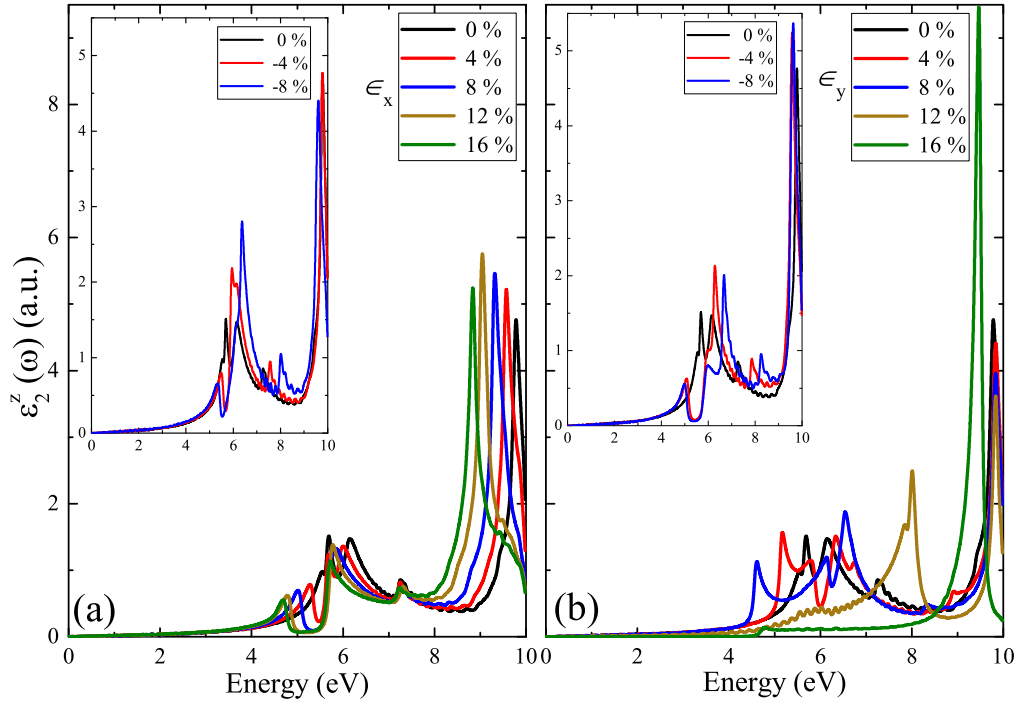

FIG. S3: Frequency dependent imaginary dielectric function ( $\varepsilon_2^z(\omega)$ ) for pristine and strained buckled-borophene along z-direction.

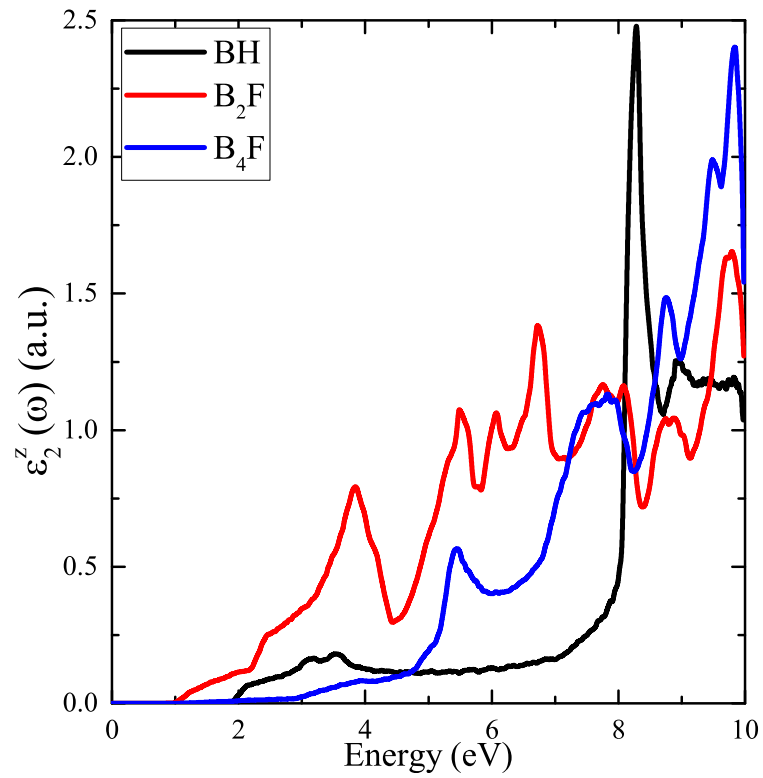

FIG. S4: Frequency dependent imaginary dielectric function ( $\epsilon_2^z(\omega)$ ) of BH, B<sub>4</sub>F, and B<sub>2</sub>F systems along z- direction.
